# Supplementary material
Source: PubMed Central journal article supplement (PMC4778744)
Supplement: NIHMS693297-supplement-License_for_Emanuel.pdf [file NIHMS693297-supplement-License_for_Emanuel.pdf]

# AMERICAN MEDICAL ASSOCIATION LICENSE TERMS AND CONDITIONS

Dec 16, 2014

---

This is a License Agreement between Parth K Modi ("You") and American Medical Association ("American Medical Association") provided by Copyright Clearance Center ("CCC"). The license consists of your order details, the terms and conditions provided by American Medical Association, and the payment terms and conditions.

**All payments must be made in full to CCC. For payment instructions, please see information listed at the bottom of this form.**

|                                   |                                                                                  |
|-----------------------------------|----------------------------------------------------------------------------------|
| License Number                    | 3530811302396                                                                    |
| License date                      | Dec 16, 2014                                                                     |
| Order Content Publisher           | American Medical Association                                                     |
| Order Content Publication         | JAMA                                                                             |
| Order Content Title               | What Makes Clinical Research Ethical?                                            |
| Order Content Author              | Emanuel, Ezekiel J., Wendler, David                                              |
| Order Content Date                | May 24, 2000                                                                     |
| Volume number                     | 283                                                                              |
| Issue number                      | 20                                                                               |
| Type of Use                       | Journal/Magazine                                                                 |
| Requestor type                    | MD/physician                                                                     |
| Requestor type                    | yes                                                                              |
| AMA ME #                          | None                                                                             |
| Format                            | print and electronic                                                             |
| Portion                           | figures/tables/images                                                            |
| Number of figures/tables/images   | 1                                                                                |
| List of figures/tables/images     | Table 2 - Seven requirements for determining whether a research trial is ethical |
| Will you be translating?          | no                                                                               |
| Circulation/distribution          | 25512                                                                            |
| Distributing to                   | Worldwide                                                                        |
| Order reference number            | None                                                                             |
| Title of the article              | Ethical Issues in the Management of Kidney Cancer                                |
| Publication the new article is in | Kidney Cancer Journal                                                            |
| Publisher of your article         | Genitourinary Publishing Associates                                              |

|                               |                 |
|-------------------------------|-----------------|
| Author of the article         | Modi, Singer    |
| Expected publication date     | Apr 2015        |
| Estimated size of the article | 10              |
| <b>Total</b>                  | <b>0.00 USD</b> |
| Terms and Conditions          |                 |

### American Medical Association's Terms and Conditions

1. The publisher for the copyrighted material you seek permission to license ("Licensed Material") is the American Medical Association ("Publisher"). By clicking "accept" in connection with completing this licensing transaction, you agree that the following terms and conditions apply to this transaction (along with the Billing and Payment terms and conditions established by Copyright Clearance Center, Inc. ["CCC"] at the time that you opened your Rightslink account and that are available at any time at <http://myaccount.copyright.com>).
2. Publisher hereby grants to you a non-exclusive license to use the Licensed Material subject to the limitations set forth herein. Licenses are for one-time use only and are limited to the use identified in your request with a maximum distribution equal to the number that you identified in the licensing process. Any form of republication must be completed within one year from the date hereof (although copies prepared before then may be distributed thereafter); and any electronic posting is limited to a period of one year.
3. **You may only obtain permission via this website to use material owned by the Publisher.** If you seek a license to use a figure, photograph, table, or illustration from an AMA publication, journal, or article, it is your responsibility to examine each such item as published to determine whether a credit to, or copyright notice of, a third-party owner was published adjacent to the item. Permission to use any material published in an AMA publication, journal, or article which is reprinted with permission of a third party must be obtained from the third-party owner. **The Publisher disclaims any responsibility for any use you make of items owned by third parties without their permission.**
4. Licenses may be exercised anywhere in the world.
5. You may not alter or modify the Licensed Material in any manner, except for the following:
  - o The Licensed Material may be superficially modified within the scope of the license granted (color, layout, etc) to suit the style/format of the proposed republication provided that specific content or data are not altered, omitted, or selectively presented; modification must not alter the meaning of the material or in any way reflect negatively on the publisher, the journal, or author(s).
  - o Within the scope of the license granted, the Licensed Material may be translated from the original English into another language where specifically covered in the grant of license.
6. Publisher reserves all rights not specifically granted in (i) the license details provided by you and accepted in the course of this licensing transaction, (ii) these terms and conditions, and (iii) CCC's Billing and Payment terms and conditions.
7. While you may exercise the rights licensed immediately upon issuance of the license at the end of the licensing process for the transaction, provided that you have disclosed complete and accurate details of your proposed use, no license is finally effective unless and until full payment is received from you (either by Publisher or by CCC) as provided in CCC's Billing and Payment terms and conditions. If full payment is not received on a timely basis, then any license preliminarily granted shall be deemed automatically revoked and shall be void as if never granted. Further, in the event that you breach any of these terms and conditions or any of CCC's Billing and Payment terms and conditions, the license is automatically revoked and shall be void as if never granted. Use of Licensed Materials as described in a revoked license, as well as any use of the Licensed Materials beyond the scope of an unrevoked license, may constitute copyright infringement and Publisher reserves the right to take any and all action to protect its copyright in the Licensed Materials.
8. You must include the following copyright and permission notice in connection with any reproduction of the Licensed Material: "Copyright © (Year of Publication) American Medical Association. All rights reserved."
9. THE LICENSED MATERIAL IS PROVIDED ON AN "AS IS" BASIS. PUBLISHER MAKES NO REPRESENTATIONS WITH RESPECT TO, AND DISCLAIMS ALL WARRANTIES, EXPRESS OR IMPLIED, RELATING TO, THE LICENSED MATERIAL, INCLUDING WITHOUT LIMITATION, IMPLIED WARRANTIES OF MERCHANTABILITY OR FITNESS FOR A PARTICULAR PURPOSE

10. You hereby indemnify and agree to hold harmless Publisher and CCC, and their respective officers, directors, employees, and agents, from and against any and all claims, liability, damages, costs, and expenses, including reasonable attorneys' fees, arising out of your use of the Licensed Material other than as specifically authorized pursuant to this license, including claims for defamation or infringement of or damage to rights of copyright, publicity, privacy, or other tangible or intangible property.
11. This license is personal to you and may not be sublicensed, assigned, or transferred by you to any other person without Publisher's written permission.
12. This license may not be amended except in writing signed by both parties (or, in the case of Publisher, by CCC on Publisher's behalf).
13. Publisher hereby objects to any terms contained in any purchase order, acknowledgement, check endorsement, or other writing prepared by you in which terms are inconsistent with these terms and conditions or CCC's Billing and Payment terms and conditions. These terms and conditions, together with CCC's Billing and Payment terms and conditions (which are incorporated herein), comprise the entire agreement between you and Publisher (and CCC) concerning this licensing transaction. In the event of any conflict between your obligations established by these terms and conditions and those established by CCC's Billing and Payment terms and conditions, these terms and conditions shall prevail.
14. This license and the licensing transaction shall be governed by and construed in accordance with the laws of the State of Illinois. You hereby agree that any dispute that may arise in connection with this license or the licensing transaction shall be submitted to binding arbitration in Chicago, Illinois, in accordance with the American Arbitration Association's rules for resolution of commercial disputes, and any award resulting from such arbitration may be entered as a judgment in any court with jurisdiction thereof.
15. Other Terms and Conditions: None

V-09072011; V1.0

Questions? [customercare@copyright.com](mailto:customercare@copyright.com) or +1-855-239-3415 (toll free in the US) or +1-978-646-2777.

**Gratis licenses (referencing \$0 in the Total field) are free. Please retain this printable license for your reference. No payment is required.**

---

---
