# Supplementary material
Source: PubMed Central journal article supplement (PMC4778744)
Supplement: NIHMS693297-supplement-License_for_Singer.pdf [file NIHMS693297-supplement-License_for_Singer.pdf]

# WOLTERS KLUWER HEALTH LICENSE TERMS AND CONDITIONS

Dec 16, 2014

This is a License Agreement between Parth K Modi ("You") and Wolters Kluwer Health ("Wolters Kluwer Health") provided by Copyright Clearance Center ("CCC"). The license consists of your order details, the terms and conditions provided by Wolters Kluwer Health, and the payment terms and conditions.

**All payments must be made in full to CCC. For payment instructions, please see information listed at the bottom of this form.**

|                                          |                                                                                                  |
|------------------------------------------|--------------------------------------------------------------------------------------------------|
| License Number                           | 3530401311404                                                                                    |
| License date                             | Dec 15, 2014                                                                                     |
| Order Content Publisher                  | Wolters Kluwer Health                                                                            |
| Order Content Publication                | Current Opinion in Oncology                                                                      |
| Order Content Title                      | Evolving%20therapeutic%20targets%20in%20renal%20cell%20carcinoma                                 |
| Order Content Author                     | Eric%20Singer,%20Gopal%20Gupta,%20Daniel%20Marchalik,%20et%20al                                  |
| Order Content Date                       | Jan 1, 2013                                                                                      |
| Volume Number                            | 25                                                                                               |
| Issue Number                             | 3                                                                                                |
| Type of Use                              | Journal/Magazine                                                                                 |
| Requestor type                           | Academic/Educational                                                                             |
| Format                                   | Print and electronic                                                                             |
| Portion                                  | Figures/table/illustration                                                                       |
| Number of figures/tables/illustrations   | 1                                                                                                |
| Figures/tables/illustrations used        | Table 2. Key phase 3 trials of FDA-approved targeted therapies for advanced renal cell carcinoma |
| Author of this Wolters Kluwer article    | Yes                                                                                              |
| Will you be translating?                 | No                                                                                               |
| Title of new article                     | Ethical Issues in the Management of Kidney Cancer                                                |
| Publication the new article is in        | Kidney Cancer Journal                                                                            |
| Publisher of new article                 | Genitourinary Publishing Associates                                                              |
| Author of new article                    | Modi, Singer                                                                                     |
| Expected publication date of new article | Apr 2015                                                                                         |
| Estimated size of new article            | 10                                                                                               |

(pages)

Billing Type

Billing Address

Invoice

Parth K Modi  
1 RWJ Place  
MEB 584  
c/o Noreen Morris  
NEW BRUNSWICK, NJ 08901  
United States  
Attn: Parth K Modi

**Total**

**0.00 USD**

Terms and Conditions

### Terms and Conditions

1. A credit line will be prominently placed and include the author(s), title of article, title of journal, volume number, issue number and inclusive pages.
2. The requestor warrants that the material shall not be used in any manner which may be considered derogatory to the title, content, or authors of the material, or to Wolters Kluwer.
3. Permission granted is non-exclusive, and is valid throughout the world in the English language and the languages specified in your original request.
4. Wolters Kluwer cannot supply the requestor with the original artwork or a "clean copy."
5. Permission is valid if the borrowed material is original to a Wolters Kluwer imprint (Lippincott-Raven Publishers, Williams & Wilkins, Lea & Febiger, Harwal, Rapid Science, Little Brown & Company, Harper & Row Medical, American Journal of Nursing Co, and Urban & Schwarzenberg - English Language).
6. If you opt not to use the material requested above, please notify RightsLink or Wolters Kluwer Health/Lippincott Williams & Wilkins within 90 days of the original invoice date.
7. This permission does not apply to images that are credited to publications other than Wolters Kluwer journals. For images credited to non-Wolters Kluwer journal publications, you will need to obtain permission from the journal referenced in the figure or table legend or credit line before making any use of the image(s) or table(s).
8. Adaptations are protected by copyright, so if you would like to reuse material that we have adapted from another source, you will need not only our permission, but the permission of the rights holder of the original material. Similarly, if you want to reuse an adaptation of original LWW content that appears in another publisher's work, you will need our permission and that of the next publisher. The adaptation should be credited as follows: Adapted with permission from Lippincott Williams and Wilkins/Wolters Kluwer Health: Book author, title, year of publication or Journal name, article author, title, reference citation, year of publication.
9. **Please note that modification of text within figures or full-text article is strictly forbidden.**
10. Please note that articles in the ahead-of-print stage of publication can be cited and the content may be re-used by including the date of access and the unique DOI number. Any final changes in manuscripts will be made at the time of print publication and will be reflected in the final electronic version of the issue. Disclaimer: Articles appearing in the Published Ahead-of-Print section have been peer-reviewed and accepted for publication in the relevant journal and posted online before print publication. Articles appearing as publish ahead-of-print may contain statements, opinions, and information that have errors in facts, figures, or interpretation. Accordingly, Lippincott Williams & Wilkins, the editors and authors and their respective employees are not responsible or liable for the use of any such inaccurate or misleading data, opinion or information contained in the articles in this section.
11. Permission is granted for a one time use only within 12 months from the date of this invoice. Rights herein do not apply to future reproductions, editions, revisions, or other derivative works. Once the 12-month term has expired, permission to renew must be submitted in writing.
12. The following statement needs to be added when reprinting the material in Open Access journals only: 'promotional and commercial use of the material in print, digital or mobile device format is prohibited without the permission from the publisher Lippincott Williams & Wilkins. Please contact

journalpermissions@lww.com for further information'.

13. In case of *Disease Colon Rectum, Plastic Reconstructive Surgery, The Green Journal, Critical Care Medicine, Pediatric Critical Care Medicine, the American Heart Publications, the American Academy of Neurology* the following guideline applies: no drug brand/trade name or logo can be included in the same page as the material re-used
14. When requesting a permission to translate a full text article, Wolters Kluwer/Lippincott Williams & Wilkins requests to receive the pdf of the translated document
15. Other Terms and Conditions:

v1.9

Questions? [customercare@copyright.com](mailto:customercare@copyright.com) or +1-855-239-3415 (toll free in the US) or +1-978-646-2777.

Gratis licenses (referencing \$0 in the Total field) are free. Please retain this printable license for your reference. No payment is required.

---

---
